# Supplementary material
Source: HighWire-hosted journal article supplement (http://www.cmaj.ca/highwire/filestream/69622/field_highwire_adjunct_files/1/171344-image-2-at.pdf)

**Appendix 2:** Computed tomography image of the abdomen showing the larger of the two hepatic abscesses, measuring 5.6 cm in maximal dimension

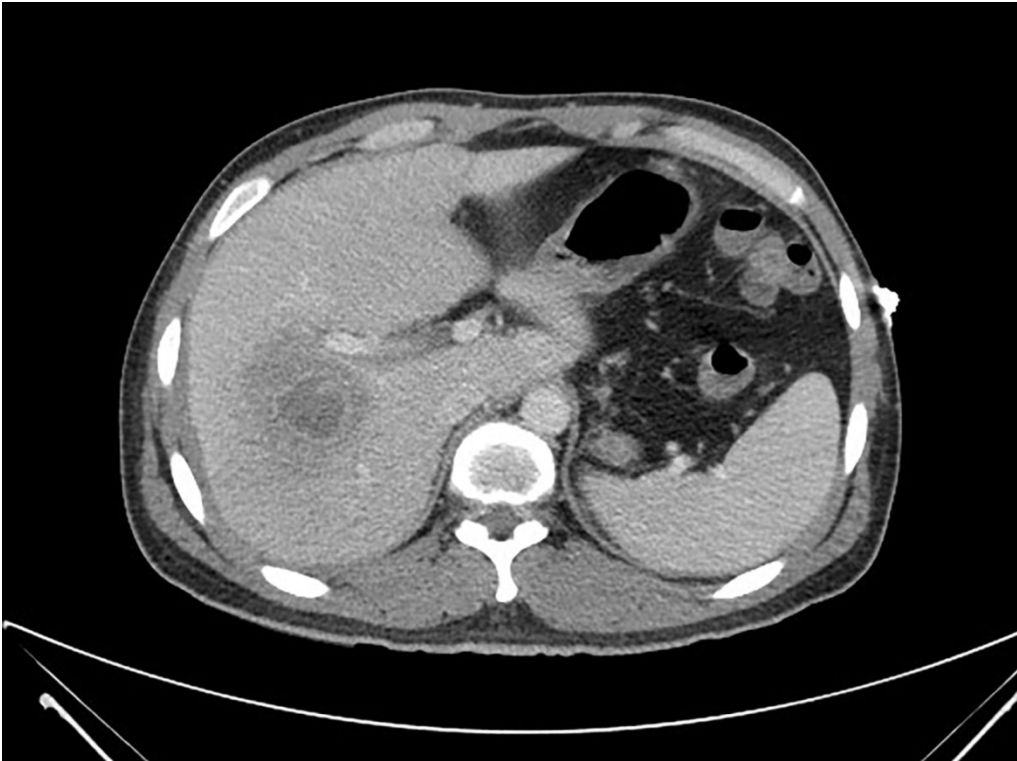

Supplement: 171344-image-2-at.pdf [file 171344-image-2-at.pdf]
